# Supplementary material for: Empirical prediction of variant-associated cryptic-donors with 87% sensitivity and 95% specificity
Source: bioRxiv or medRxiv preprint supplement (doi:10.1101/2021.07.18.452855), 2021-07-19
Supplement: Supplementary file [file media-1.pdf]

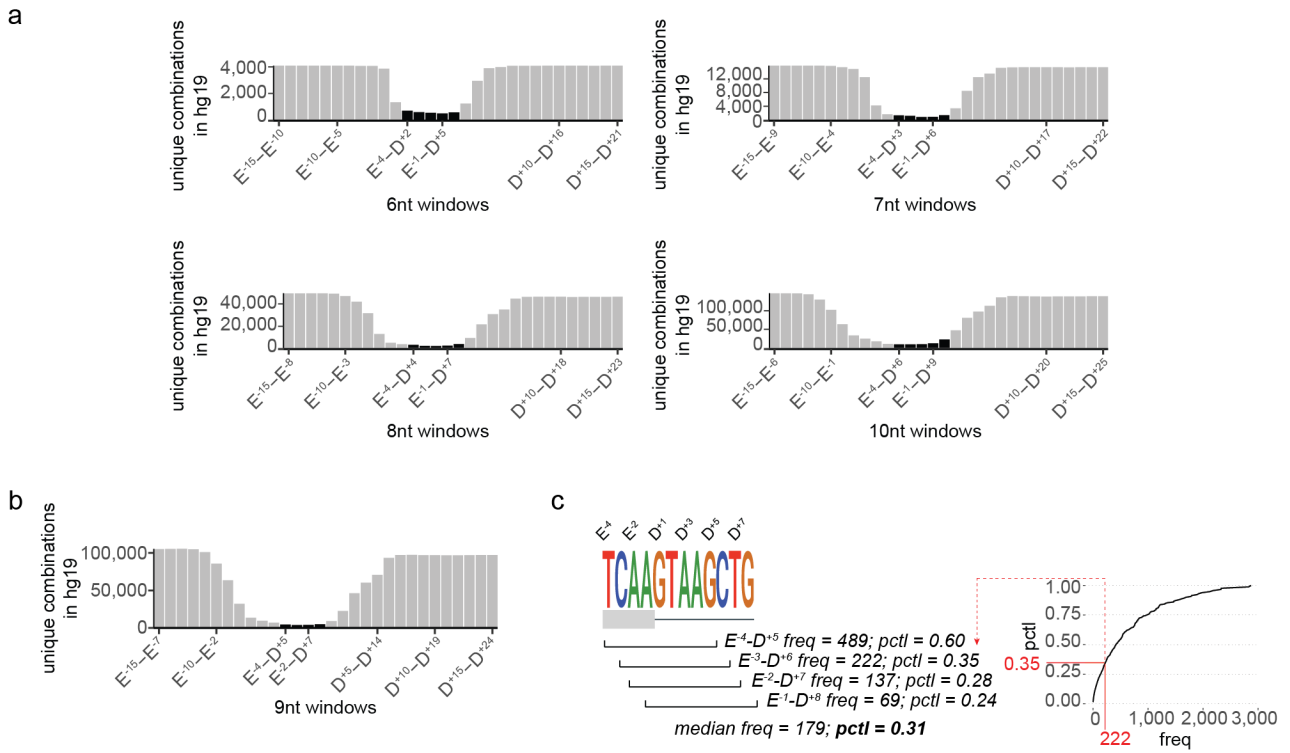

**Fig. S1 Calculation of Donor Frequency as a measure of donor strength. a-b)** Frequency of unique combinations of donor sequences at each position of the exon-intron junction in hg19, spanning 6, 7, 8, 10 (a) or 9 (b) consecutive nucleotides. Black bars denote windows overlapping the  $E^4$ - $D^{+8}$  donor sequence window. Four sliding windows of 9 nt spanning the authentic-donor (coloured *black*), spanning 12 nt from the fourth-to-last exonic base ( $E^4$ ; E = exon) to the eighth intronic base ( $D^{+8}$ ; D = donor), were used for DF calculation. **d)** Donor Frequency is calculated as the median frequency (in hg19) across each 9nt window, converted to a cumulative percentile distribution. DF provides a barometer related to ‘how common’ a given donor sequence is in humans, as a measure of splicing competence. In this example, a median DF raw value of 179 lies at the 31st percentile of a hg19 cumulative frequency distribution.

**a AM-variants**

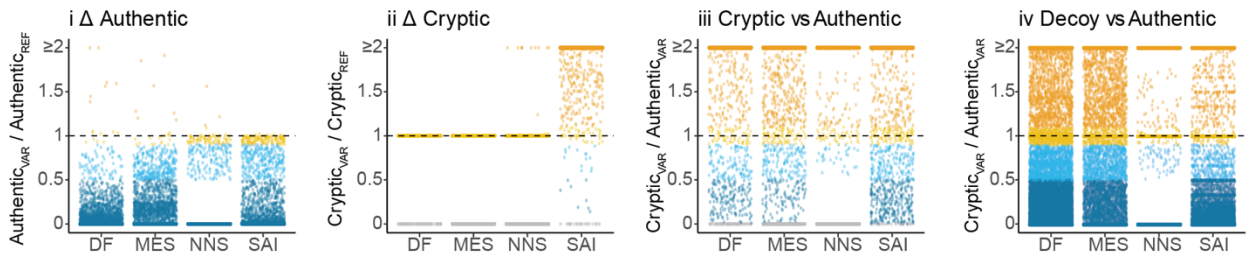

**b CM-variants**

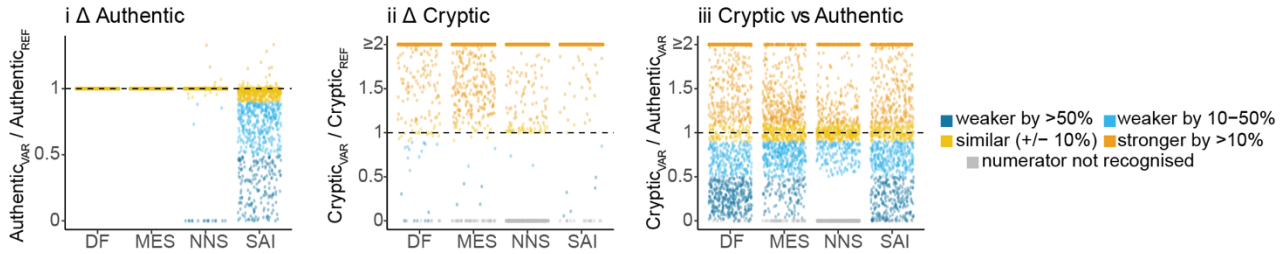

**c AM/CM-variants**

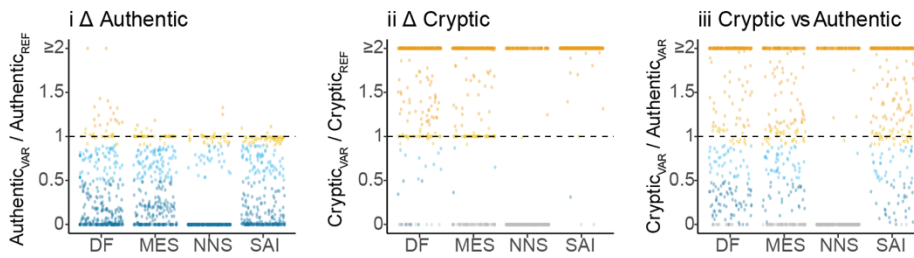

**d**

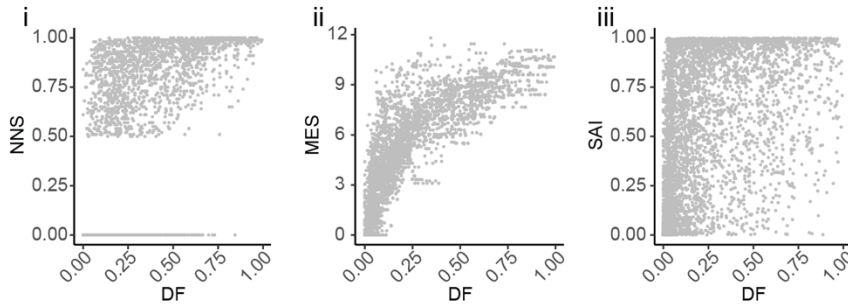

**Fig. S2 Algorithmic prediction of cryptic-activation.** **a-c)** DF (Donor Frequency), MES (MaxEntScan), NNS (NNSplice) and SAI (SpliceAI) scores for **(a)** AM-variants **(b)** CM-variants and **(c)** AM/CM-variants. Colour coding is explained in the Figure key. When a donor strength score of 0 is returned, we set it to 0.000001 to allow for the D calculations (VAR/REF; VAR = variant; REF = reference). **d)** Comparison of **(i)** NNS, **(ii)** MES and **(iii)** SAI scores with DF for all cryptic-donors (scores for VAR sequence) in our Cryptic-Donor database. DF shows strongest correlation with MaxEntScan. NNSplice does not recognise a subset of human donors to offer a strength prediction.

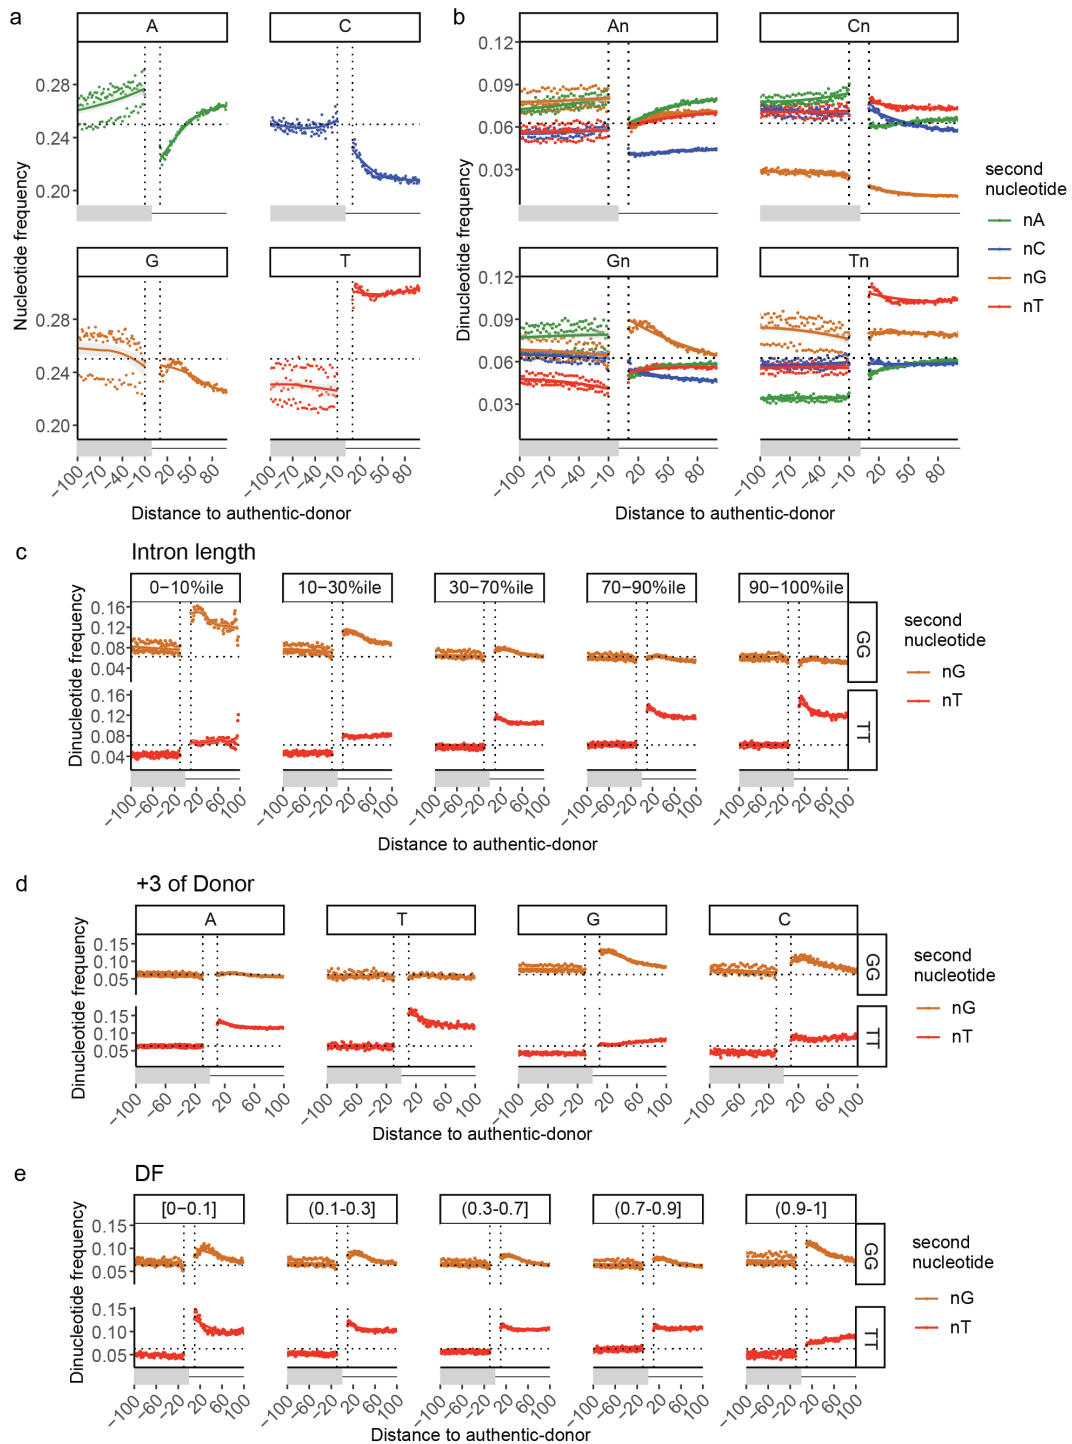

**Fig. S3 G- and T- dinucleotide repeats show distinct patterns of enrichment in different introns. a-b)** frequencies of each **(a)** nucleotide and **(b)** dinucleotide at each position surrounding authentic-donors. Vertical dotted lines denote boundaries at -10 and +10 where calculations start (i.e. excluding the conserved extended splice-site region). Horizontal dotted lines denote a random frequency of **a)** 1/4 for single nucleotides and **b)** 1/16 for dinucleotides. Lines show LOESS smoothing (locally weighted smoothing i.e. trendlines) with confidence bands in grey. In **(b)** Panels are according to the first nucleotide and colours are according to the second nucleotide in the dinucleotide. Note enrichment of G- and T- dinucleotides in the first 50 nt of the intron. **c-e)** frequencies of dinucleotides GG, and TT at each position surrounding authentic-donors. Vertical dotted lines denote boundaries at -10 and +10 where calculations start, horizontal dotted line denotes a random frequency of 1/16. Lines show LOESS smoothing (locally weighted smoothing i.e. trendlines) with grey confidence bands. **a)** G-repeats are enriched in the shortest human introns whereas T-repeats are enriched in longer introns. Length bins: < 149 nt (< 10<sup>th</sup> percentile), 149-627 nt (10 - 30<sup>th</sup> percentile), 628-3010 nt (30 - 70<sup>th</sup> percentile), 3011-9270 nt (70 - 90<sup>th</sup> percentile), > 9270 nt (> 90<sup>th</sup> percentile). **b)** Authentic donors with D<sup>+3</sup> A (or C) are enriched in G-dinucleotides whereas donors with D<sup>+3</sup> G (or T) are enriched in T-dinucleotides. **c)** Rare donors (low DF) show greater enrichment for T dinucleotide repeats compared with common donors.

# 1. Partition sequences, into exonic, intronic, and donor

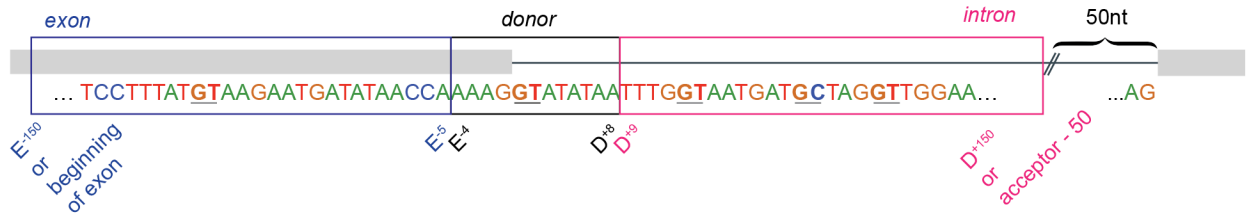

# 2. Shuffle exons and introns separately, maintaining dinucleotide frequencies

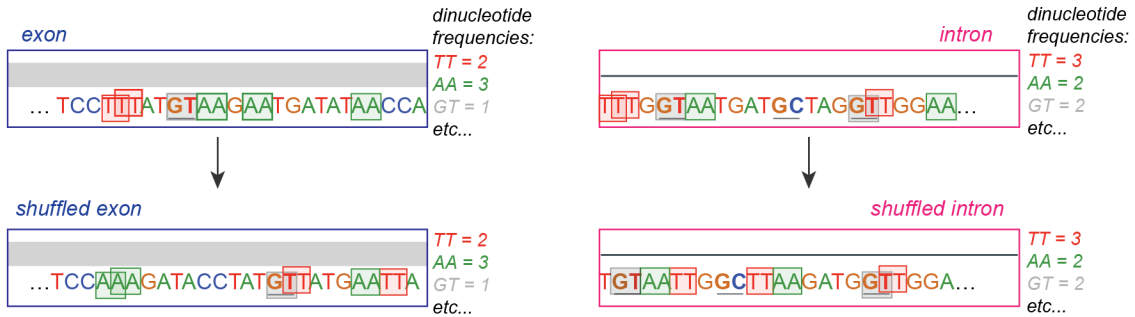

# 3. create set of shuffled exon-intron junction sequences

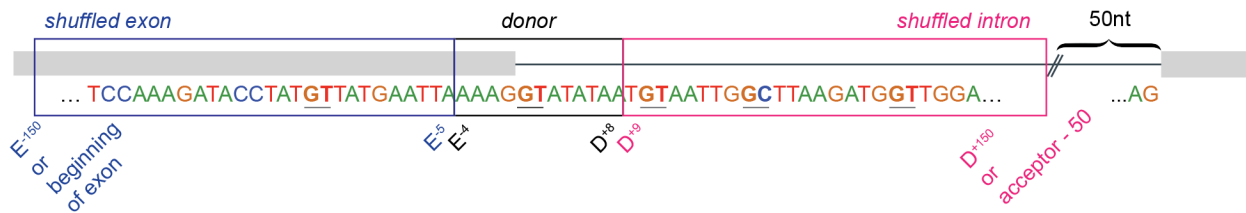

# 4. Tally decoy-donors at each nucleotide in reference & shuffled sequence sets

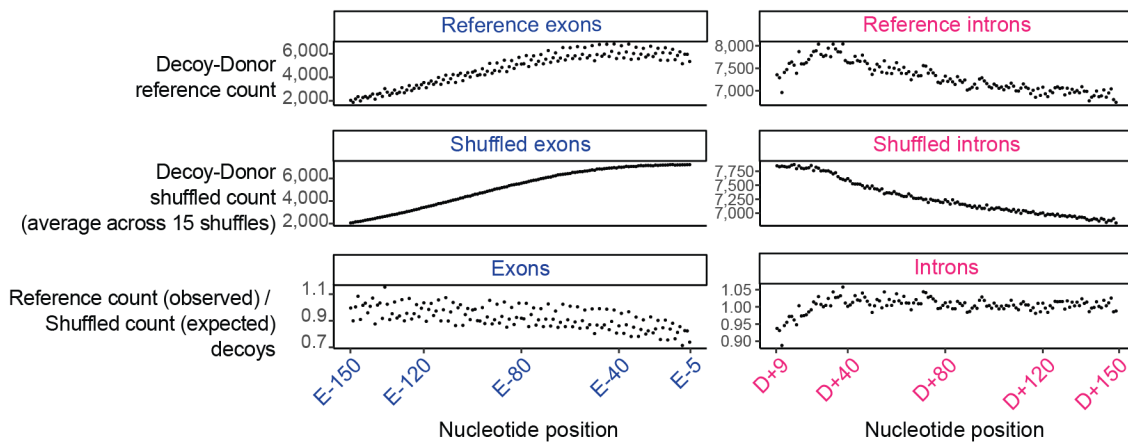

Fig. S4 Schematic representation of how decoy depletion is calculated. Sequences in blue 'exon' and pink 'intron' boxes are shuffled separately (maintaining dinucleotide frequencies) and the number of actual decoy-donors at each position is divided by the number in the shuffled sequence set.

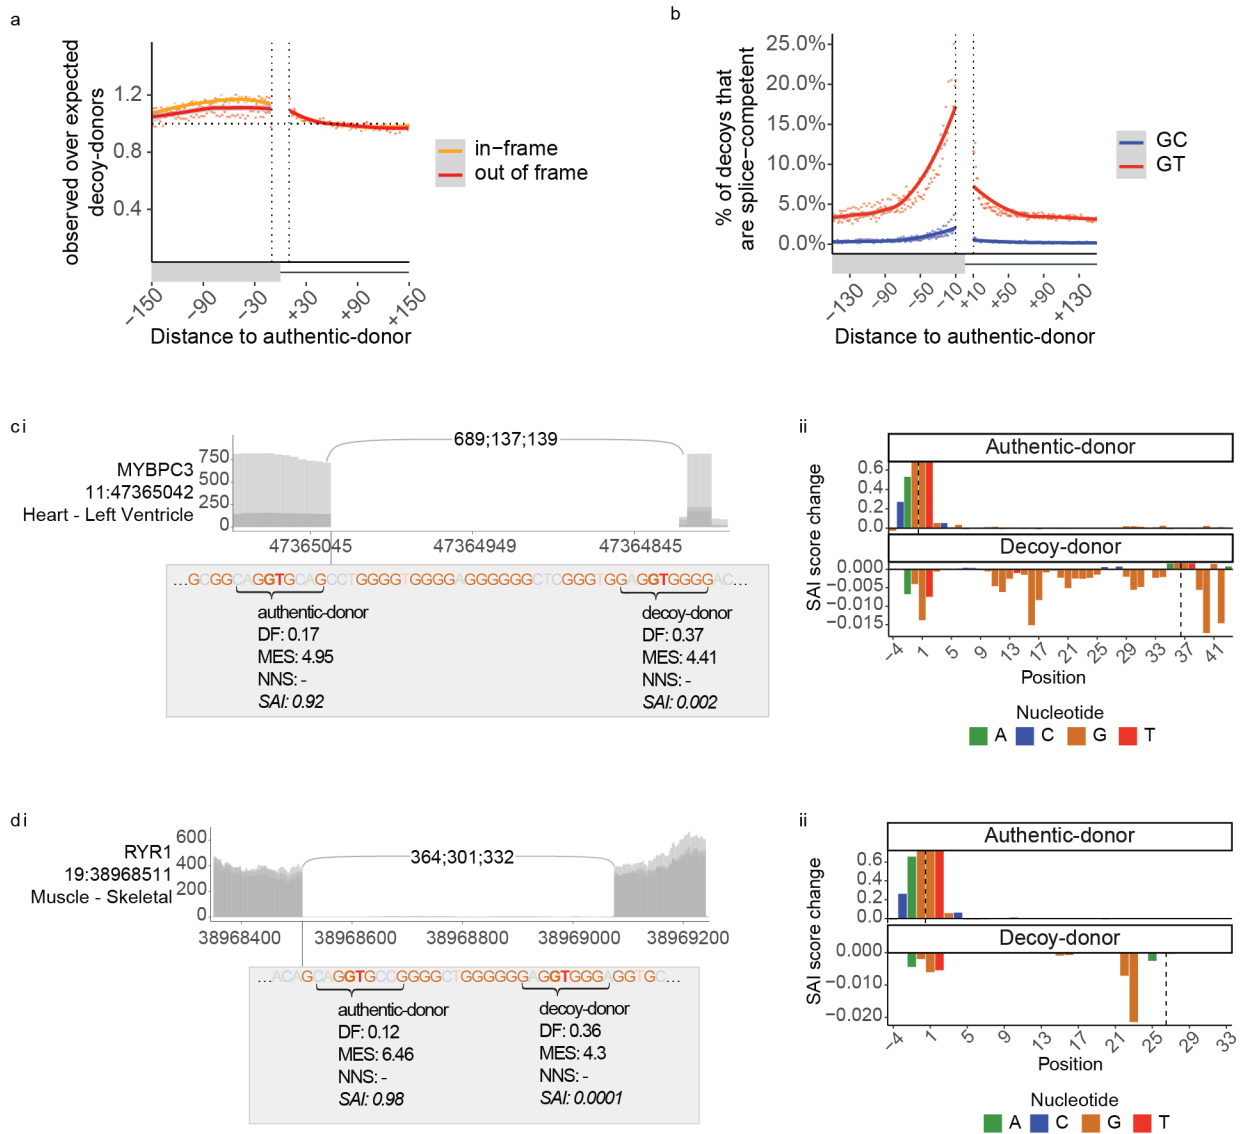

**Fig. S5 Splice competence provides insight into natural use of decoy-donors by the spliceosome. a)** The ratio of observed to expected 'GC' decoy-donors at each position +/-150 nt of authentic-donors in hg19. *Yellow*: In-frame exonic decoy-donors. *Red*: Exonic out-of-frame or intronic decoy-donors. **b)** The percent of decoys that are *splice competent* +/-150 nt of authentic-donors in hg19. *Red*: 'GT' decoy-donors show increasing *splice competence* with proximity to the authentic-donor. *Blue*: 'GC' decoy-donors show inherent low *splice competence*. At each position the number of *splice competent decoy-donors* (i.e. at least 1 read in aggregate RNA-Seq splice-junction data (see Methods) is divided by the total number of naturally occurring decoy-donors at that position. Lines show LOESS smoothing (locally weighted smoothing i.e. trendlines) with *grey* confidence bands. **c-d)** two examples of decoy-donors overlapping G-repeats that outcompete the authentic-donor according to DF and MES, but show no evidence for *splice competence*, and which SAI correctly identifies as non-functional donors. **i)** Shows overlays of 3 GTEx RNA-seq samples from the tissues with the highest TPM for that gene. The numbers (e.g. 689;137;139) denote the detected reads in each respective sample for that splice-junction. Algorithmic strength scores for authentic- and decoy-donors are boxed. **ii)** Result of SAI *in silico mutagenesis* showing the bases contributing to predicted strength of the authentic-donor (top) and decoy-donor (bottom). 'SAI score change' denotes the decrease (if positive) or increase (if negative) on the predicted strength of the donor when that nucleotide is mutated (see methods).

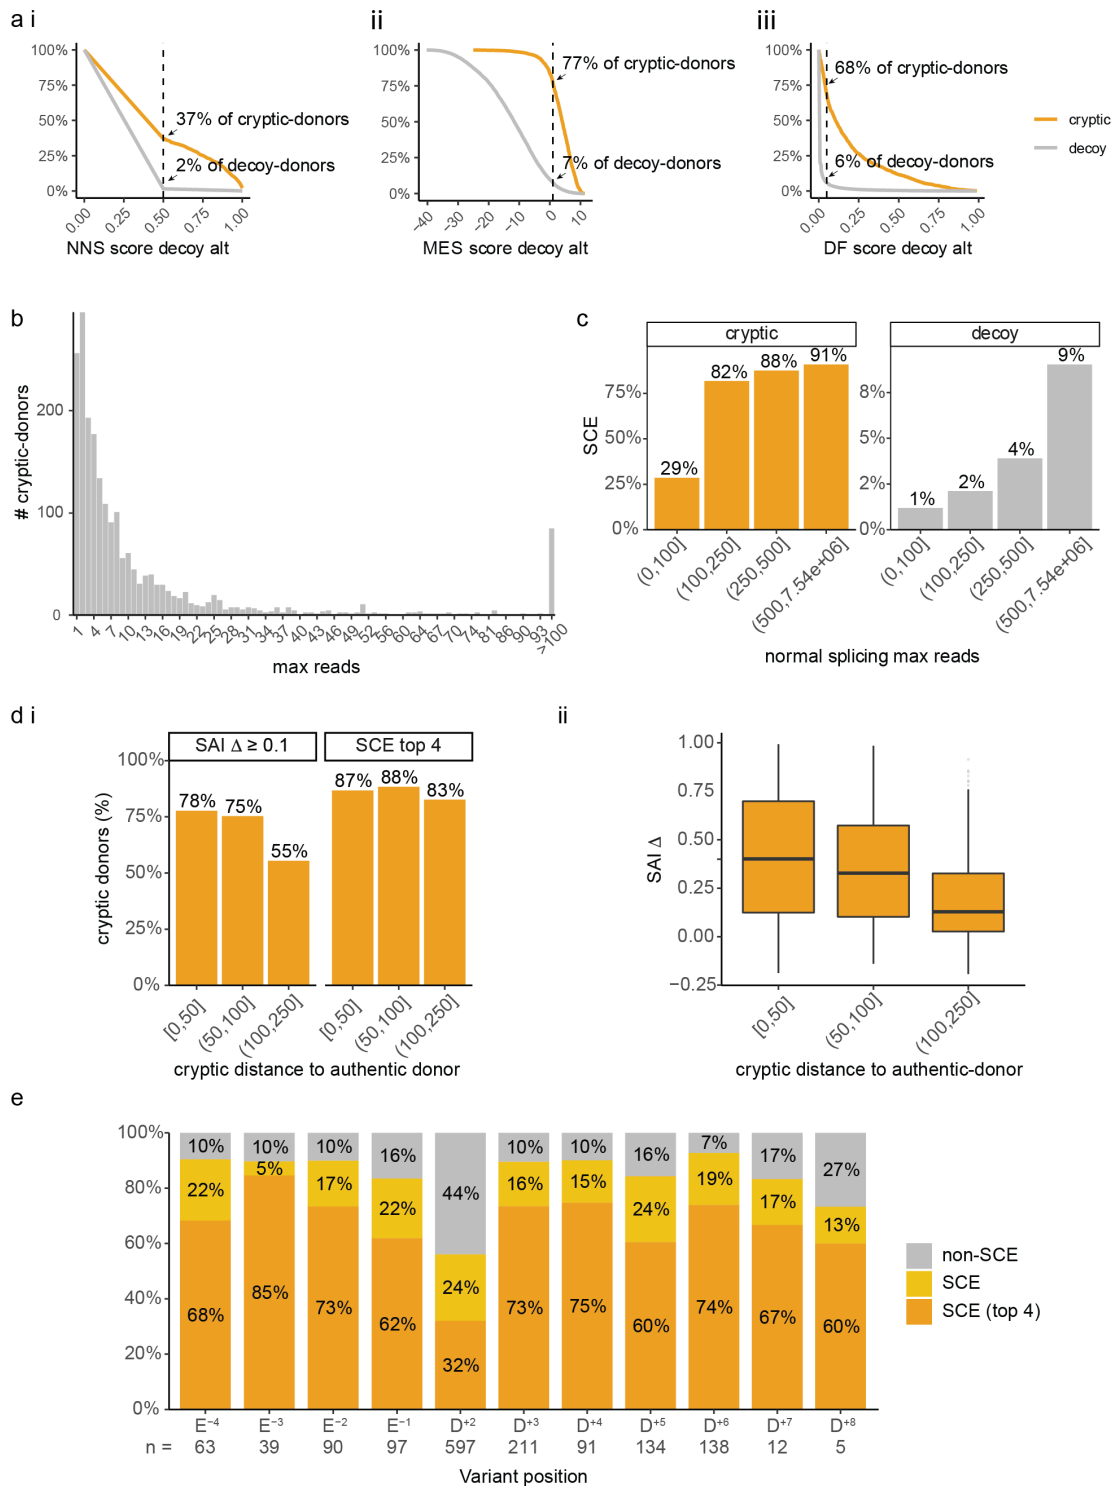

**Fig. S6 Metrics relevant to the employment of *splice competence* and SAI for prediction of cryptic selection.** **a)** Sensitivity (orange) and specificity (grey) of (i) NNS using a cut-off of 0.5, (ii) MES using a cut-off of 1 and (iii) DF using a cut-off of 0.05 to predict cryptic-donor activation in AM-variants. **b)** The maximum number of reads detected across 40,233 RNA-seq samples for each cryptic-donor activated by an AM-variant. **c)** Read-depth of the target gene influences sensitivity of SCE (*splice competent* events). SCE predicts only 29% of cryptic-donors for target genes with < 100 max reads corresponding to normal splicing at the exon-exon junction under scrutiny, rising sharply to > 82% predictive accuracy with more than 100 max reads corresponding to normal splicing. **d)** Percent of AM-variant cryptic-donors with SAI  $\Delta$  scores greater than or equal to 0.1 (left) or in the SCE top 4 (right) in different bins according to cryptic distance to the authentic-donor. SpliceAI's ability to accurately identify cryptic-donors activated by AM-variants drops to 55% sensitivity for cryptic-donors more than 100 nt from the authentic-donor. **ii)** SAI decoy- $\Delta$  scores for cryptic-donors relative to their distance from the authentic-donor. **e)** The percent of CM- and AM/CM-variant cryptics detected as *splice competent* events (SCE), according to the position of the SNV within the extended splice-site region of the activated cryptic-donor.
